# Supplementary material
Source: PubMed Central journal article supplement (PMC4142031)
Supplement: rstb20130510supp1.pdf [file rstb20130510supp1.pdf]

## Supplementary Information

**Table S1**

**Supplementary Table 1:** List of neuronal genes regulated in exosome-dependent fashion as detected by microarray analysis (Illumina BeadArray Mouse v2 microarray platform). The RNA profiles of neurons exposed in Boyden chamber co-culture to exosomes, and neurons cultured with exosome-depleted pOL-conditioned medium were compared. Significantly regulated genes are depicted down to a false discovery rate (FDR) of 20% (n=4). The logFC value is the logarithmic representation of the fold change (FC) value. The candidate genes displayed in red were further validated by qRT-PCR.

| ID           | Symbol    | Description                                                                                 | logFC | FDR (p-value) |
|--------------|-----------|---------------------------------------------------------------------------------------------|-------|---------------|
| ILMN_2737200 | Mbp       | myelin basic protein                                                                        | 0,87  | 1.79e-07      |
| ILMN_1216764 | Ier3      | immediate early response 3                                                                  | -0,52 | 1.48e-04      |
| ILMN_1221503 | Ccnd1     | cyclin D1                                                                                   | -0,52 | 1.48e-04      |
| ILMN_2601471 | Ccnd1     | cyclin D1                                                                                   | -0,47 | 3.10e-03      |
| ILMN_2836654 | NA        | NA                                                                                          | -0,46 | 3.10e-03      |
| ILMN_2929896 | Pbk       | PDZ binding kinase                                                                          | -0,42 | 3.10e-03      |
| ILMN_2955725 | Cort      | cortistatin                                                                                 | -0,44 | 3.10e-03      |
| ILMN_1226607 | Cort      | cortistatin                                                                                 | -0,42 | 3.10e-03      |
| ILMN_2739843 | Metrn     | meteorin, glial cell differentiation regulator                                              | -0,42 | 3.10e-03      |
| ILMN_2795040 | NA        | NA                                                                                          | -0,45 | 4.06e-03      |
| ILMN_1219574 | Hist1h2af | histone cluster 1, H2af                                                                     | -0,46 | 4.11e-03      |
| ILMN_2634520 | Ctnnd2    | catenin (cadherin associated protein), delta 2                                              | 0,41  | 4.20e-03      |
| ILMN_1236574 | Cenpa     | centromere protein A                                                                        | -0,4  | 4.25e-03      |
| ILMN_1234112 | Tomm70a   | translocase of outer mitochondrial membrane 70 homolog A (yeast)                            | 0,39  | 9.30e-03      |
| ILMN_3112526 | Ldb2      | LIM domain binding 2                                                                        | 0,39  | 1.30e-02      |
| ILMN_2754435 | Ldb2      | LIM domain binding 2                                                                        | 0,38  | 1.44e-02      |
| ILMN_1220100 | Ywhae     | tyrosine 3-monooxygenase/tryptophan 5-monooxygenase activation protein, epsilon polypeptide | 0,38  | 1.93e-02      |
| ILMN_2925923 | Vgf       | VGF nerve growth factor inducible                                                           | -0,36 | 2.52e-02      |
| ILMN_1225182 | Cdca3     | cell division cycle associated 3                                                            | -0,4  | 2.67e-02      |
| ILMN_2933022 | Plekhb1   | pleckstrin homology domain containing, family B (evectins) member 1                         | -0,38 | 2.67e-02      |
| ILMN_2847144 | Hist1h2ak | histone cluster 1, H2ak                                                                     | -0,42 | 2.86e-02      |
| ILMN_2693895 | Acta2     | actin, alpha 2, smooth muscle, aorta                                                        | 0,60  | 2.92e-02      |
| ILMN_3128907 | Cd63      | CD63 antigen                                                                                | -0,36 | 3.06e-02      |
| ILMN_2617468 | Chac1     | ChaC, cation transport regulator 1                                                          | -0,37 | 3.36e-02      |
| ILMN_2662264 | Bcas1     | breast carcinoma amplified sequence 1                                                       | 0,37  | 4.60e-02      |
| ILMN_2670398 | Eif4ebp1  | eukaryotic translation initiation factor 4E binding protein 1                               | -0,35 | 4.64e-02      |
| ILMN_2644008 | Chl1      | cell adhesion molecule with homology to L1CAM                                               | 0,34  | 4.72e-02      |
| ILMN_2652909 | Ddit3     | DNA-damage inducible transcript 3                                                           | -0,35 | 4.87e-02      |
| ILMN_2591440 | Ccrn4l    | CCR4 carbon catabolite repression 4-like ( <i>S. cerevisiae</i> )                           | 0,33  | 5.36e-02      |
| ILMN_2627557 | Tbc1d19   | TBC1 domain family, member 19                                                               | 0,34  | 5.75e-02      |
| ILMN_1257987 | Slc7a3    | solute carrier family 7 (cationic amino acid transporter, y+ system), member 3              | -0,33 | 6.00e-02      |

|              |           |                                                                            |       |          |
|--------------|-----------|----------------------------------------------------------------------------|-------|----------|
| ILMN_1260082 | Asphd1    | aspartate beta-hydroxylase domain containing 1                             | -0,34 | 7.02e-02 |
| ILMN_2601884 | Gpcpd1    | glycerophosphocholine phosphodiesterase GDE1 homolog (S. cerevisiae)       | 0,32  | 7.11e-02 |
| ILMN_2657844 | Cdk1      | cyclin-dependent kinase 1                                                  | -0,32 | 7.45e-02 |
| ILMN_2662450 | Runx1t1   | runt-related transcription factor 1; translocated to, 1 (cyclin D-related) | 0,32  | 7.74e-02 |
| ILMN_2669699 | NA        | NA                                                                         | 0,34  | 8.55e-02 |
| ILMN_3161626 | Prkag2    | protein kinase, AMP-activated, gamma 2 non-catalytic subunit               | 0,31  | 1.06e-01 |
| ILMN_2852957 | Dkk3      | dickkopf homolog 3 (Xenopus laevis)                                        | 0,31  | 1.13e-01 |
| ILMN_2662926 | Egr1      | early growth response 1                                                    | 0,51  | 1.17e-01 |
| ILMN_1245335 | Neur1b    | neuralized homolog 1b (Drosophila)                                         | 0,33  | 1.17e-01 |
| ILMN_2722938 | Ppp1r15a  | protein phosphatase 1, regulatory (inhibitor) subunit 15A                  | -0,31 | 1.20e-01 |
| ILMN_2693922 | Egfr      | epidermal growth factor receptor                                           | -0,31 | 1.21e-01 |
| ILMN_2623216 | Pgrmc1    | progesterone receptor membrane component 1                                 | 0,31  | 1.21e-01 |
| ILMN_1234072 | Pdlim1    | PDZ and LIM domain 1 (elfin)                                               | -0,32 | 1.23e-01 |
| ILMN_2512541 | Ube2n     | ubiquitin-conjugating enzyme E2N                                           | 0,31  | 1.27e-01 |
| ILMN_1224333 | Osbp11    | oxysterol binding protein-like 11                                          | 0,33  | 1.27e-01 |
| ILMN_3105417 | Bdnf      | brain derived neurotrophic factor                                          | -0,33 | 1.28e-01 |
| ILMN_1216042 | Apoe      | apolipoprotein E                                                           | -0,33 | 1.32e-01 |
| ILMN_2632712 | Birc5     | baculoviral IAP repeat-containing 5                                        | -0,32 | 1.41e-01 |
| ILMN_2730329 | Hist1h2ah | histone cluster 1, H2ah                                                    | -0,34 | 1.45e-01 |
| ILMN_1228557 | Id2       | inhibitor of DNA binding 2                                                 | 0,32  | 1.65e-01 |
| ILMN_1248830 | Hist1h2an | histone cluster 1, H2an                                                    | -0,35 | 1.65e-01 |
| ILMN_2625167 | Eif4g2    | eukaryotic translation initiation factor 4, gamma 2                        | 0,32  | 1.72e-01 |
| ILMN_1247066 | Caprin1   | cell cycle associated protein 1                                            | 0,3   | 1.72e-01 |
| ILMN_1225528 | Trib3     | tribbles homolog 3 (Drosophila)                                            | -0,3  | 1.72e-01 |
| ILMN_2762326 | Kif22     | kinesin family member 22                                                   | -0,33 | 1.72e-01 |
| ILMN_1220409 | Cetn2     | centrin 2                                                                  | 0,33  | 1.79e-01 |
| ILMN_1248892 | Tmem184c  | transmembrane protein 184C                                                 | 0,3   | 1.79e-01 |
| ILMN_2528345 | Zfhx2     | zinc finger homeobox 2                                                     | -0,32 | 1.90e-01 |
| ILMN_2908070 | Gtse1     | G two S phase expressed protein 1                                          | -0,32 | 1.92e-01 |
| ILMN_2868280 | Dcxr      | dicarbonyl L-xylulose reductase                                            | -0,29 | 1.92e-01 |
| ILMN_2719202 | Hist1h2bf | histone cluster 1, H2bf                                                    | -0,3  | 1.92e-01 |
| ILMN_1255053 | Plk1      | polo-like kinase 1                                                         | -0,31 | 1.92e-01 |
| ILMN_2647627 | Ppp1cb    | protein phosphatase 1, catalytic subunit, beta isoform                     | 0,31  | 1.93e-01 |
| ILMN_2886828 | Rarb      | retinoic acid receptor, beta                                               | -0,3  | 1.96e-01 |
| ILMN_2598420 | Scaf8     | SR-related CTD-associated factor 8                                         | 0,29  | 1.96e-01 |
| ILMN_2751854 | Ndr4      | N-myc downstream regulated gene 4                                          | 0,31  | 1.96e-01 |
| ILMN_1231710 | Crhbp     | corticotropin releasing hormone binding protein                            | -0,3  | 1.98e-01 |
